# Supplementary material for: Prevalence and consequences of psoriasis in recent axial spondyloarthritis: an analysis of the DESIR cohort over 6 years
Source: HighWire-hosted journal article supplement (doi:10.1136/rmdopen-2021-001986), 2022-01-01
Supplement: rmdopen-2021-001986supp001_data_supplement.pdf [file rmdopen-2021-001986supp001_data_supplement.pdf]

**Supplementary Table 1. Cumulative prevalence of psoriasis in the DESIR cohort over 6 years of follow-up**

|                                                                                                      | Inclusion | M6   | M12  | M18  | M24  | M36  | M48  | M60  | M72  |
|------------------------------------------------------------------------------------------------------|-----------|------|------|------|------|------|------|------|------|
| <b>Whole population (N=708)</b>                                                                      |           |      |      |      |      |      |      |      |      |
| Total number of patients with cumulative psoriasis in the entire cohort (lost to follow-up included) | 118       | 118  | 125  | 125  | 141  | 150  | 163  | 169  | 180  |
| Number of patients with cumulative psoriasis at each visit                                           | 118       | 118  | 125  | 122  | 139  | 141  | 152  | 156  | 158  |
| Number of patients in the DESIR cohort with complete data                                            | 708       | 706  | 693  | 689  | 687  | 643  | 633  | 616  | 589  |
| Prevalence of psoriasis (%)                                                                          | 16.7      | 16.7 | 18.0 | 17.7 | 20.2 | 21.9 | 24   | 25.4 | 26.8 |
| <b>Population present at 6 years of follow-up (N=589)</b>                                            |           |      |      |      |      |      |      |      |      |
| Number of patients with cumulative psoriasis at each visit                                           | 99        | 99   | 104  | 104  | 119  | 128  | 141  | 147  | 158  |
| Prevalence of psoriasis (%)                                                                          | 16.8      | 16.8 | 17.7 | 17.7 | 20.2 | 21.7 | 23.9 | 25.0 | 26.8 |

When taking into account patients lost to follow-up, there were overall 180 patients with psoriasis in the DESIR cohort over 6 years.

Prevalence of psoriasis was calculated at each visit in patients still present at 6 years (N=589) and in patients who completed each scheduled visit (ie, the whole population, N at baseline=708 then with decreasing numbers over time). The number of patients who completed the visit decreased over time so the prevalence of these two populations converges at 6 years.
